# Supplementary material for: What kinds of three-dimensional nets are possible with tris-chelated metal complexes as building blocks?
Source: Royal Society of Chemistry journal article supplement (doi:10.1039/b310330g), 2004-01-01
Supplement: b310330gcoord.pdf [file b310330gcoord.pdf]

Supplementary Material (ESI) for Dalton Transactions  
This journal is © The Royal Society of Chemistry 2003

Supplementary material

(10,3)-a

TITLE 103a or Srsi2  
CELL 6.0 6. 6. 90. 90. 90.  
ATOM Si 0.125 0.125 0.125  
SPGR I 41 3 2

63

|   |           |          |          |
|---|-----------|----------|----------|
| C | -3.12500  | 0.62500  | -0.62500 |
| C | -4.37500  | 0.62500  | 0.62500  |
| C | -5.62500  | 1.87500  | 0.62500  |
| C | -6.87500  | 1.87500  | -0.62500 |
| C | -3.12500  | -0.62500 | -1.87500 |
| C | -1.87500  | -1.87500 | -1.87500 |
| C | -4.37500  | -0.62500 | -3.12500 |
| C | -4.37500  | -0.62500 | 1.87500  |
| C | -3.12500  | -0.62500 | 3.12500  |
| C | -5.62500  | -1.87500 | 1.87500  |
| C | -5.62500  | 3.12500  | 1.87500  |
| C | -6.87500  | 3.12500  | -1.87500 |
| C | -8.12500  | 0.62500  | -0.62500 |
| C | -9.37500  | 0.62500  | 0.62500  |
| C | -8.12500  | -0.62500 | -1.87500 |
| C | -1.87500  | -1.87500 | 3.12500  |
| C | -1.87500  | -3.12500 | -0.62500 |
| C | -3.12500  | 0.62500  | 4.37500  |
| C | -3.12500  | -4.37500 | -0.62500 |
| C | -4.37500  | 0.62500  | -4.37500 |
| C | -5.62500  | -1.87500 | -3.12500 |
| C | -6.87500  | -1.87500 | -1.87500 |
| C | -6.87500  | -1.87500 | 3.12500  |
| C | -5.62500  | -3.12500 | 0.62500  |
| C | -8.12500  | -0.62500 | 3.12500  |
| C | -4.37500  | -4.37500 | 0.62500  |
| C | -6.87500  | -3.12500 | -0.62500 |
| C | -8.12500  | 0.62500  | 4.37500  |
| C | -9.37500  | -0.62500 | 1.87500  |
| C | -10.62500 | 1.87500  | 0.62500  |
| C | -10.62500 | -1.87500 | 1.87500  |
| C | -11.87500 | 1.87500  | -0.62500 |
| C | -10.62500 | 3.12500  | 1.87500  |
| C | -9.37500  | -0.62500 | -3.12500 |
| C | -9.37500  | 0.62500  | -4.37500 |
| C | -10.62500 | -1.87500 | -3.12500 |
| C | -8.12500  | -4.37500 | -0.62500 |
| C | -9.37500  | -4.37500 | 0.62500  |
| C | -11.87500 | 3.12500  | -1.87500 |
| C | -11.87500 | -1.87500 | 3.12500  |
| C | -10.62500 | -3.12500 | 0.62500  |
| C | -13.12500 | -0.62500 | 3.12500  |
| C | -11.87500 | -3.12500 | -0.62500 |
| C | -13.12500 | 0.62500  | -0.62500 |
| C | -14.37500 | 0.62500  | 0.62500  |
| C | -13.12500 | -0.62500 | -1.87500 |
| C | -11.87500 | -1.87500 | -1.87500 |
| C | -1.87500  | -3.12500 | 4.37500  |
| C | -3.12500  | -5.62500 | -1.87500 |
| C | -5.62500  | -3.12500 | -4.37500 |
| C | -4.37500  | -5.62500 | 1.87500  |
| C | -10.62500 | -3.12500 | -4.37500 |
| C | -8.12500  | -5.62500 | -1.87500 |
| C | -14.37500 | -0.62500 | 1.87500  |
| C | -13.12500 | 0.62500  | 4.37500  |
| C | -13.12500 | -4.37500 | -0.62500 |
| C | -15.62500 | 1.87500  | 0.62500  |
| C | -14.37500 | -0.62500 | -3.12500 |

|   |           |          |          |
|---|-----------|----------|----------|
| C | -6.87500  | -3.12500 | 4.37500  |
| C | -11.87500 | -3.12500 | 4.37500  |
| C | -9.37500  | -5.62500 | 1.87500  |
| C | -15.62500 | 3.12500  | 1.87500  |
| C | -13.12500 | -5.62500 | -1.87500 |

(10,3)-b

TITLE 103b or ThSi2  
CELL 4.134 4.134 14.32 90. 90. 90.  
ATOM Si 0. 0.25 0.2915  
SPGR I 41/a m d

96

|    |          |          |          |
|----|----------|----------|----------|
| Si | 0.00000  | 0.00000  | 5.97511  |
| Si | -2.06300 | 0.00000  | 4.78439  |
| Si | 2.06300  | 0.00000  | 4.78439  |
| Si | 0.00000  | 0.00000  | 8.37089  |
| Si | -2.06300 | 0.00000  | 2.38861  |
| Si | 4.12600  | 0.00000  | 5.97511  |
| Si | 2.06300  | 0.00000  | 2.38861  |
| Si | 0.00000  | -2.06300 | 9.56161  |
| Si | 0.00000  | 2.06300  | 9.56161  |
| Si | -2.06300 | -2.06300 | 1.19789  |
| Si | -2.06300 | 2.06300  | 1.19789  |
| Si | -2.06300 | -2.06300 | -1.19789 |
| Si | -2.06300 | -4.12600 | 2.38861  |
| Si | -2.06300 | 2.06300  | -1.19789 |
| Si | -2.06300 | 4.12600  | 2.38861  |
| Si | 6.18900  | 0.00000  | 4.78439  |
| Si | 4.12600  | 0.00000  | 8.37089  |
| Si | 8.25200  | 0.00000  | 5.97511  |
| Si | 6.18900  | 0.00000  | 2.38861  |
| Si | 4.12600  | -2.06300 | 9.56161  |
| Si | 4.12600  | 2.06300  | 9.56161  |
| Si | 2.06300  | -2.06300 | 1.19789  |
| Si | 2.06300  | 2.06300  | 1.19789  |
| Si | 2.06300  | -2.06300 | -1.19789 |
| Si | 2.06300  | -4.12600 | 2.38861  |
| Si | 2.06300  | 2.06300  | -1.19789 |
| Si | 2.06300  | 4.12600  | 2.38861  |
| Si | 0.00000  | -4.12600 | 8.37089  |
| Si | 0.00000  | -4.12600 | 5.97511  |
| Si | 0.00000  | 4.12600  | 8.37089  |
| Si | 0.00000  | 4.12600  | 5.97511  |
| Si | -2.06300 | -4.12600 | 4.78439  |
| Si | -2.06300 | 4.12600  | 4.78439  |
| Si | 10.31500 | 0.00000  | 4.78439  |
| Si | 8.25200  | 0.00000  | 8.37089  |
| Si | 10.31500 | 0.00000  | 2.38861  |
| Si | 8.25200  | -2.06300 | 9.56161  |
| Si | 8.25200  | 2.06300  | 9.56161  |
| Si | 6.18900  | -2.06300 | 1.19789  |
| Si | 6.18900  | 2.06300  | 1.19789  |
| Si | 6.18900  | -2.06300 | -1.19789 |
| Si | 6.18900  | -4.12600 | 2.38861  |
| Si | 6.18900  | 2.06300  | -1.19789 |
| Si | 6.18900  | 4.12600  | 2.38861  |
| Si | 4.12600  | -4.12600 | 5.97511  |
| Si | 4.12600  | 4.12600  | 8.37089  |
| Si | 4.12600  | 4.12600  | 5.97511  |
| Si | 2.06300  | -4.12600 | 4.78439  |
| Si | 2.06300  | 4.12600  | 4.78439  |
| Si | -2.06300 | 6.18900  | 1.19789  |
| Si | -2.06300 | 6.18900  | -1.19789 |
| Si | 2.06300  | 6.18900  | 1.19789  |
| Si | 2.06300  | 6.18900  | -1.19789 |
| Si | 10.31500 | -2.06300 | 1.19789  |
| Si | 10.31500 | 2.06300  | 1.19789  |
| Si | 10.31500 | -2.06300 | -1.19789 |
| Si | 10.31500 | -4.12600 | 2.38861  |

Supplementary Material (ESI) for Dalton Transactions  
This journal is © The Royal Society of Chemistry 2003

|                                |          |          |          |    |          |          |          |
|--------------------------------|----------|----------|----------|----|----------|----------|----------|
| Si                             | 10.31500 | 2.06300  | -1.19789 | Al | 7.00000  | 0.57735  | 4.62222  |
| Si                             | 10.31500 | 4.12600  | 2.38861  | Al | 4.00000  | -1.15470 | -2.31111 |
| Si                             | 8.25200  | -4.12600 | 8.37089  | Al | 5.00000  | -2.88675 | 4.62222  |
| Si                             | 8.25200  | -4.12600 | 5.97511  | Al | 4.00000  | -1.15470 | 8.08889  |
| Si                             | 8.25200  | 4.12600  | 8.37089  | Al | 2.00000  | 2.30940  | 8.08889  |
| Si                             | 8.25200  | 4.12600  | 5.97511  | Al | -1.00000 | -2.88675 | 1.15556  |
| Si                             | 6.18900  | -4.12600 | 4.78439  | Al | -4.00000 | -1.15470 | 5.77778  |
| Si                             | 6.18900  | 4.12600  | 4.78439  | Al | 2.00000  | -4.61880 | 5.77778  |
| Si                             | 6.18900  | 6.18900  | 1.19789  | Al | 1.00000  | -2.88675 | 2.31111  |
| Si                             | 6.18900  | 6.18900  | -1.19789 | Al | -1.00000 | -2.88675 | 9.24444  |
| Si                             | 0.00000  | -2.06300 | -2.38861 | Al | 1.00000  | 0.57735  | 9.24444  |
| Si                             | 0.00000  | 2.06300  | -2.38861 | Al | -3.00000 | 0.57735  | 9.24444  |
| Si                             | 4.12600  | -2.06300 | -2.38861 | Al | 9.00000  | 0.57735  | -1.15556 |
| Si                             | 4.12600  | 2.06300  | -2.38861 | Al | 8.00000  | -1.15470 | 5.77778  |
| Si                             | 8.25200  | -2.06300 | -2.38861 | Al | 6.00000  | 2.30940  | 5.77778  |
| Si                             | 8.25200  | 2.06300  | -2.38861 | Al | 3.00000  | -2.88675 | -1.15556 |
| Si                             | 0.00000  | 6.18900  | -2.38861 | Al | 6.00000  | -4.61880 | 5.77778  |
| Si                             | 4.12600  | 6.18900  | -2.38861 | Al | 5.00000  | -2.88675 | 2.31111  |
| Si                             | 10.31500 | -4.12600 | 4.78439  | Al | 3.00000  | -2.88675 | 9.24444  |
| Si                             | 10.31500 | 4.12600  | 4.78439  | Al | 5.00000  | 0.57735  | 9.24444  |
| Si                             | 10.31500 | 6.18900  | 1.19789  | Al | -3.00000 | -2.88675 | 2.31111  |
| Si                             | 8.25200  | 6.18900  | -2.38861 | Al | -3.00000 | -2.88675 | 4.62222  |
| Si                             | 0.00000  | -2.06300 | -4.78439 | Al | -4.00000 | -1.15470 | 8.08889  |
| Si                             | 0.00000  | 2.06300  | -4.78439 | Al | 2.00000  | -4.61880 | 8.08889  |
| Si                             | 4.12600  | -2.06300 | -4.78439 | Al | 3.00000  | -2.88675 | 1.15556  |
| Si                             | 4.12600  | 2.06300  | -4.78439 | Al | -2.00000 | -4.61880 | 8.08889  |
| Si                             | 8.25200  | -2.06300 | -4.78439 | Al | 8.00000  | -1.15470 | 8.08889  |
| Si                             | 8.25200  | 2.06300  | -4.78439 | Al | 6.00000  | 2.30940  | 8.08889  |
| Si                             | 0.00000  | 6.18900  | -4.78439 | Al | 6.00000  | -4.61880 | 8.08889  |
| Si                             | 4.12600  | 6.18900  | -4.78439 | Al | 7.00000  | -2.88675 | 1.15556  |
| Si                             | 10.31500 | 6.18900  | -1.19789 | Al | -2.00000 | -4.61880 | 5.77778  |
| Si                             | 8.25200  | 6.18900  | -4.78439 | Al | -2.00000 | -4.61880 | -2.31111 |
| Si                             | 0.00000  | 0.00000  | -5.97511 | Al | 7.00000  | -2.88675 | 9.24444  |
| Si                             | 0.00000  | 4.12600  | -5.97511 | Al | 2.00000  | -4.61880 | -2.31111 |
| Si                             | 4.12600  | 0.00000  | -5.97511 | Al | 9.00000  | -2.88675 | 2.31111  |
| Si                             | 4.12600  | 4.12600  | -5.97511 | Al | 7.00000  | -2.88675 | -1.15556 |
| Si                             | 8.25200  | 0.00000  | -5.97511 | Al | 11.00000 | 0.57735  | 2.31111  |
| Si                             | 8.25200  | 4.12600  | -5.97511 | Al | 8.00000  | -1.15470 | -2.31111 |
|                                |          |          |          | Al | 9.00000  | -2.88675 | 4.62222  |
|                                |          |          |          | Al | 9.00000  | 0.57735  | 9.24444  |
| (10,3) -c                      |          |          |          | Al | 3.00000  | -6.35085 | 4.62222  |
| TITLE 103c or B2O3             |          |          |          | Al | -1.00000 | -2.88675 | 11.55556 |
| CELL 3.46 3.46 9. 90. 90. 120. |          |          |          | Al | 1.00000  | 0.57735  | 11.55556 |
| ATOM Si 0.33333 0.166666       |          |          |          | Al | -3.00000 | 0.57735  | 11.55556 |
| 0.111111                       |          |          |          | Al | 7.00000  | -6.35085 | 4.62222  |
| SPGR P 31 1 2                  |          |          |          | Al | 3.00000  | -2.88675 | 11.55556 |
|                                |          |          |          | Al | 5.00000  | 0.57735  | 11.55556 |
| 105                            |          |          |          | Al | 1.00000  | -6.35085 | 9.24444  |
|                                |          |          |          | Al | 5.00000  | -6.35085 | 9.24444  |
| Al 1.00000                     | 0.57735  | 1.15556  |          | Al | -1.00000 | -6.35085 | 4.62222  |
| Al -1.00000                    | 0.57735  | 2.31111  |          | Al | 7.00000  | -2.88675 | 11.55556 |
| Al 3.00000                     | 0.57735  | 2.31111  |          | Al | 1.00000  | -6.35085 | -1.15556 |
| Al 1.00000                     | 0.57735  | -1.15556 |          | Al | 6.00000  | -4.61880 | -2.31111 |
| Al -3.00000                    | 0.57735  | 1.15556  |          | Al | 11.00000 | 0.57735  | 4.62222  |
| Al -1.00000                    | 0.57735  | 4.62222  |          | Al | 9.00000  | 0.57735  | 11.55556 |
| Al 5.00000                     | 0.57735  | 1.15556  |          | Al | 10.00000 | 2.30940  | 8.08889  |
| Al 3.00000                     | 0.57735  | 4.62222  |          | Al | 4.00000  | -8.08290 | 5.77778  |
| Al 0.00000                     | -1.15470 | -2.31111 |          | Al | 3.00000  | -6.35085 | 2.31111  |
| Al -5.00000                    | 0.57735  | 2.31111  |          | Al | -3.00000 | -2.88675 | 12.71111 |
| Al -3.00000                    | 0.57735  | -1.15556 |          | Al | 1.00000  | -2.88675 | 12.71111 |
| Al 0.00000                     | -1.15470 | 5.77778  |          | Al | -1.00000 | 0.57735  | 12.71111 |
| Al -2.00000                    | 2.30940  | 5.77778  |          | Al | 3.00000  | 0.57735  | 12.71111 |
| Al 7.00000                     | 0.57735  | 2.31111  |          | Al | -5.00000 | 0.57735  | 12.71111 |
| Al 5.00000                     | 0.57735  | -1.15556 |          | Al | 7.00000  | -6.35085 | 2.31111  |
| Al 4.00000                     | -1.15470 | 5.77778  |          | Al | 5.00000  | -2.88675 | 12.71111 |
| Al 2.00000                     | 2.30940  | 5.77778  |          | Al | 7.00000  | 0.57735  | 12.71111 |
| Al -1.00000                    | -2.88675 | -1.15556 |          | Al | 1.00000  | -6.35085 | 11.55556 |
| Al -5.00000                    | 0.57735  | 4.62222  |          | Al | 0.00000  | -8.08290 | 8.08889  |
| Al -4.00000                    | -1.15470 | -2.31111 |          | Al | 5.00000  | -6.35085 | 11.55556 |
| Al 1.00000                     | -2.88675 | 4.62222  |          | Al | 4.00000  | -8.08290 | 8.08889  |
| Al 0.00000                     | -1.15470 | 8.08889  |          | Al | 0.00000  | -8.08290 | 5.77778  |
| Al -2.00000                    | 2.30940  | 8.08889  |          | Al | -1.00000 | -6.35085 | 2.31111  |
| Al 9.00000                     | 0.57735  | 1.15556  |          |    |          |          |          |

Supplementary Material (ESI) for Dalton Transactions  
This journal is © The Royal Society of Chemistry 2003

|                                  |          |          |          |   |          |          |          |
|----------------------------------|----------|----------|----------|---|----------|----------|----------|
| Al                               | 9.00000  | -2.88675 | 12.71111 | B | 3.60000  | -0.30016 | 3.13040  |
| Al                               | 1.00000  | -6.35085 | 1.15556  | B | 5.60000  | -0.30016 | 0.44720  |
| Al                               | 10.00000 | 2.30940  | 5.77778  | B | 4.40000  | 1.29984  | 1.34160  |
| Al                               | 5.00000  | -6.35085 | -1.15556 | B | 4.40000  | -1.90016 | -2.23600 |
| Al                               | 11.00000 | 0.57735  | 12.71111 | B | 2.40000  | -1.90016 | -1.34160 |
| Al                               | 5.00000  | -6.35085 | 1.15556  | B | 1.60000  | 2.89984  | -3.13040 |
| Al                               | -1.00000 | -6.35085 | 12.71111 | B | 0.40000  | 1.29984  | -2.23600 |
| Al                               | 3.00000  | -6.35085 | 12.71111 | B | 4.40000  | 1.29984  | -2.23600 |
| Al                               | 7.00000  | -6.35085 | 12.71111 | B | 3.60000  | 2.89984  | -0.44720 |
|                                  |          |          |          | B | 0.40000  | 4.49984  | 1.34160  |
|                                  |          |          |          | B | -0.40000 | 2.89984  | -0.44720 |
| (10,3)-d                         |          |          |          | B | 2.40000  | 4.49984  | -1.34160 |
| TITLE (10,3)-d or 3/10/o1        |          |          |          | B | 1.60000  | -0.30016 | 4.02480  |
| CELL 4. 3.2 3.5776 90.000 90.000 |          |          |          | B | 3.60000  | 2.89984  | 3.13040  |
| 90.000                           |          |          |          | B | 1.60000  | 2.89984  | 4.02480  |
| ATOM C .100 0.0938 0.125         |          |          |          | B | 0.40000  | 4.49984  | 4.91920  |
| SPGR P n n a                     |          |          |          | B | -2.40000 | 2.89984  | 4.02480  |
|                                  |          |          |          | B | -1.60000 | 4.49984  | 2.23600  |
|                                  |          |          |          | B | -2.40000 | 2.89984  | 0.44720  |
| 140                              |          |          |          | B | -3.60000 | 1.29984  | 1.34160  |
| B                                | 0.40000  | 0.30016  | 0.44720  | B | -2.40000 | -0.30016 | 4.02480  |
| B                                | 1.60000  | -0.30016 | 0.44720  | B | -4.40000 | -0.30016 | -0.44720 |
| B                                | 0.40000  | 1.29984  | 1.34160  | B | -3.60000 | -1.90016 | 1.34160  |
| B                                | -0.40000 | -0.30016 | -0.44720 | B | -2.40000 | 2.89984  | -3.13040 |
| B                                | 1.60000  | -1.29984 | 1.34160  | B | -3.60000 | 1.29984  | -2.23600 |
| B                                | 2.40000  | 0.30016  | -0.44720 | B | 1.60000  | -3.50016 | -3.13040 |
| B                                | 1.60000  | 1.90016  | 1.34160  | B | -0.40000 | -3.50016 | -4.02480 |
| B                                | -0.40000 | 1.90016  | 2.23600  | B | 1.60000  | -0.30016 | -3.13040 |
| B                                | -1.60000 | 0.30016  | -0.44720 | B | -2.40000 | -0.30016 | -3.13040 |
| B                                | -0.40000 | -1.29984 | -1.34160 | B | -3.60000 | -1.90016 | -2.23600 |
| B                                | 0.40000  | -1.90016 | 1.34160  | B | -2.40000 | -3.50016 | 0.44720  |
| B                                | 2.40000  | -1.90016 | 2.23600  | B | 1.60000  | -4.49984 | 1.34160  |
| B                                | 3.60000  | -0.30016 | -0.44720 | B | 2.40000  | -2.89984 | -0.44720 |
| B                                | 2.40000  | 1.29984  | -1.34160 | B | -0.40000 | -4.49984 | -1.34160 |
| B                                | 1.60000  | 2.89984  | 0.44720  | B | 0.40000  | 0.30016  | 4.02480  |
| B                                | 2.40000  | 1.29984  | 2.23600  | B | -1.60000 | -2.89984 | 3.13040  |
| B                                | -0.40000 | 2.89984  | 3.13040  | B | 0.40000  | -2.89984 | 4.02480  |
| B                                | -1.60000 | 1.29984  | 2.23600  | B | 1.60000  | -4.49984 | 4.91920  |
| B                                | -2.40000 | -0.30016 | 0.44720  | B | 4.40000  | -2.89984 | 4.02480  |
| B                                | -1.60000 | 1.29984  | -1.34160 | B | 3.60000  | -4.49984 | 2.23600  |
| B                                | 0.40000  | -1.90016 | -2.23600 | B | 4.40000  | -2.89984 | 0.44720  |
| B                                | -1.60000 | -1.90016 | -1.34160 | B | 5.60000  | -1.29984 | 1.34160  |
| B                                | 0.40000  | -2.89984 | 0.44720  | B | 4.40000  | 0.30016  | 4.02480  |
| B                                | -0.40000 | -1.29984 | 2.23600  | B | 6.40000  | 0.30016  | -0.44720 |
| B                                | 2.40000  | -2.89984 | 3.13040  | B | 5.60000  | 1.90016  | 1.34160  |
| B                                | 3.60000  | -1.29984 | 2.23600  | B | 4.40000  | -2.89984 | -3.13040 |
| B                                | 4.40000  | 0.30016  | 0.44720  | B | 5.60000  | -1.29984 | -2.23600 |
| B                                | 3.60000  | -1.29984 | -1.34160 | B | 0.40000  | 3.50016  | -3.13040 |
| B                                | 1.60000  | 1.90016  | -2.23600 | B | 2.40000  | 3.50016  | -4.02480 |
| B                                | 3.60000  | 1.90016  | -1.34160 | B | 0.40000  | 0.30016  | -3.13040 |
| B                                | 0.40000  | 3.50016  | 0.44720  | B | 4.40000  | 0.30016  | -3.13040 |
| B                                | 2.40000  | 3.50016  | -0.44720 | B | 5.60000  | 1.90016  | -2.23600 |
| B                                | 2.40000  | 0.30016  | 3.13040  | B | 4.40000  | 3.50016  | 0.44720  |
| B                                | 3.60000  | 1.90016  | 2.23600  | B | 1.60000  | 5.10016  | 1.34160  |
| B                                | 0.40000  | 3.50016  | 4.02480  | B | -0.40000 | 5.10016  | 2.23600  |
| B                                | -1.60000 | 3.50016  | 3.13040  | B | -1.60000 | 3.50016  | -0.44720 |
| B                                | -2.40000 | 1.90016  | 1.34160  | B | 1.60000  | 5.10016  | -2.23600 |
| B                                | -1.60000 | 0.30016  | 3.13040  | B | 3.60000  | 5.10016  | -1.34160 |
| B                                | -3.60000 | 0.30016  | 0.44720  | B | 1.60000  | -1.29984 | 4.91920  |
| B                                | -2.40000 | -1.29984 | 1.34160  | B | 4.40000  | 3.50016  | 4.02480  |
| B                                | -2.40000 | 1.90016  | -2.23600 | B | 2.40000  | 3.50016  | 3.13040  |
| B                                | -0.40000 | 1.90016  | -1.34160 | B | 1.60000  | 1.90016  | 4.91920  |
| B                                | 0.40000  | -2.89984 | -3.13040 | B | 1.60000  | 5.10016  | 4.91920  |
| B                                | 1.60000  | -1.29984 | -2.23600 | B | -0.40000 | 5.10016  | 5.81360  |
| B                                | -2.40000 | -1.29984 | -2.23600 | B | 3.60000  | 3.50016  | 4.02480  |
| B                                | -1.60000 | -2.89984 | -0.44720 | B | -2.40000 | 1.90016  | 4.91920  |
| B                                | 1.60000  | -3.50016 | 0.44720  | B | -2.40000 | 5.10016  | 1.34160  |
| B                                | -0.40000 | -3.50016 | -0.44720 | B | -3.60000 | 3.50016  | 0.44720  |
| B                                | -0.40000 | -0.30016 | 3.13040  | B | -4.40000 | 1.90016  | 2.23600  |
| B                                | -1.60000 | -1.90016 | 2.23600  | B | -3.60000 | 0.30016  | 4.02480  |
| B                                | 1.60000  | -3.50016 | 4.02480  | B | -2.40000 | -1.29984 | 4.91920  |
| B                                | 3.60000  | -3.50016 | 3.13040  | B | -5.60000 | 0.30016  | -0.44720 |
| B                                | 4.40000  | -1.90016 | 1.34160  |   |          |          |          |

Supplementary Material (ESI) for Dalton Transactions  
 This journal is © The Royal Society of Chemistry 2003

|          |                        |          |          |    |          |          |          |
|----------|------------------------|----------|----------|----|----------|----------|----------|
| B        | -4.40000               | -1.29984 | -1.34160 | Al | -2.70833 | -2.81458 | -3.00000 |
| B        | -3.60000               | -2.89984 | 0.44720  | Al | 3.79167  | -2.81458 | -3.00000 |
| B        | -4.40000               | -1.29984 | 2.23600  | Al | 0.54167  | 2.81458  | -3.00000 |
| B        | -3.60000               | 3.50016  | -3.13040 | Al | -2.70833 | -2.81458 | 0.00000  |
| B        | -1.60000               | 3.50016  | -4.02480 | Al | 3.79167  | -2.81458 | 0.00000  |
| B        | -3.60000               | 0.30016  | -3.13040 | Al | -2.70833 | -2.81458 | 3.00000  |
| B        | -4.40000               | 1.90016  | -1.34160 | Al | 3.79167  | -2.81458 | 3.00000  |
| B        | 1.60000                | -4.49984 | -2.23600 | Al | -2.16667 | -3.75278 | -2.50000 |
| B        | 2.40000                | -2.89984 | -4.02480 | Al | 4.33333  | -3.75278 | -2.50000 |
| B        | -1.60000               | -2.89984 | -4.02480 | Al | 1.08333  | 1.87639  | -2.50000 |
| B        | -0.40000               | -4.49984 | -4.91920 | Al | -2.16667 | -3.75278 | 0.50000  |
| B        | 2.40000                | 0.30016  | -4.02480 | Al | 4.33333  | -3.75278 | 0.50000  |
| B        | -1.60000               | 0.30016  | -4.02480 | Al | -1.08333 | -3.75278 | -2.00000 |
| B        | -3.60000               | -2.89984 | -3.13040 | Al | 5.41667  | -3.75278 | -2.00000 |
| B        | -2.40000               | -4.49984 | 1.34160  | Al | 2.16667  | 1.87639  | -2.00000 |
|          |                        |          |          | Al | -1.08333 | -3.75278 | 1.00000  |
| (10,3)-e |                        |          |          | Al | 5.41667  | -3.75278 | 1.00000  |
|          |                        |          |          | Al | -0.54167 | -2.81458 | -1.50000 |
| TITLE    | 103e                   |          |          | Al | 5.95833  | -2.81458 | -1.50000 |
| CELL     | 7.5 7.5 3 90. 90. 120. |          |          | Al | -0.54167 | -2.81458 | 1.50000  |
| ATOM     | C1                     | 0.33333  | 0.50000  | Al | 5.95833  | -2.81458 | 1.50000  |
|          |                        | 0.00000  |          | Al | -1.08333 | -1.87639 | -1.00000 |
| ATOM     | C2                     | 0.33333  | 0.33333  | Al | 5.41667  | -1.87639 | -1.00000 |
|          |                        | 0.16667  |          | Al | -1.08333 | -1.87639 | 2.00000  |
| ATOM     | C3                     | 0.50000  | 0.33333  | Al | 5.41667  | -1.87639 | 2.00000  |
|          |                        | 0.33333  |          | Al | -2.16667 | -1.87639 | -0.50000 |
| ATOM     | C4                     | 0.66667  | 0.50000  | Al | 4.33333  | -1.87639 | -0.50000 |
|          |                        | 0.50000  |          | Al | -2.16667 | -1.87639 | 2.50000  |
| ATOM     | C5                     | 0.66667  | 0.66667  | Al | 4.33333  | -1.87639 | 2.50000  |
|          |                        | 0.66667  |          | Al | -2.92500 | -0.56292 | -0.50000 |
| ATOM     | C6                     | 0.50000  | 0.66667  | Al | 3.57500  | -0.56292 | -0.50000 |
|          |                        | 0.83333  |          | Al | -2.92500 | -0.56292 | 2.50000  |
| ATOM     | C7                     | 0.50000  | 0.90000  | Al | 3.57500  | -0.56292 | 2.50000  |
|          |                        | 0.83333  |          | Al | -0.32500 | -0.56292 | -1.00000 |
| ATOM     | C8                     | 0.90000  | 0.90000  | Al | 6.17500  | -0.56292 | -1.00000 |
|          |                        | 0.66667  |          | Al | -0.32500 | -0.56292 | 2.00000  |
| ATOM     | C9                     | 0.90000  | 0.50000  | Al | 6.17500  | -0.56292 | 2.00000  |
|          |                        | 0.50000  |          | Al | 0.97500  | -2.81458 | -1.50000 |
| ATOM     | C10                    | 0.50000  | 0.10000  | Al | 7.47500  | -2.81458 | -1.50000 |
|          |                        | 0.33333  |          | Al | -2.27500 | 2.81458  | -1.50000 |
| ATOM     | C11                    | 0.10000  | 0.10000  | Al | 4.22500  | 2.81458  | -1.50000 |
|          |                        | 0.16667  |          | Al | 0.97500  | -2.81458 | 1.50000  |
| ATOM     | C12                    | 0.10000  | 0.50000  | Al | 7.47500  | -2.81458 | 1.50000  |
|          |                        | 0.00000  |          | Al | -2.27500 | 2.81458  | 1.50000  |
| SPGR     | P 1                    |          |          | Al | -0.32500 | -5.06625 | -2.00000 |
|          |                        |          |          | Al | 6.17500  | -5.06625 | -2.00000 |
| 151      |                        |          |          | Al | -3.57500 | 0.56292  | -2.00000 |
|          |                        |          |          | Al | 2.92500  | 0.56292  | -2.00000 |
| Al       | 0.54167                | 2.81458  | 0.00000  | Al | -0.32500 | -5.06625 | 1.00000  |
| Al       | 1.08333                | 1.87639  | 0.50000  | Al | 6.17500  | -5.06625 | 1.00000  |
| Al       | 2.16667                | 1.87639  | 1.00000  | Al | -3.57500 | 0.56292  | 1.00000  |
| Al       | 2.70833                | 2.81458  | 1.50000  | Al | -2.92500 | -5.06625 | -2.50000 |
| Al       | 2.16667                | 3.75278  | 2.00000  | Al | 3.57500  | -5.06625 | -2.50000 |
| Al       | 1.08333                | 3.75278  | 2.50000  | Al | 0.32500  | 0.56292  | -2.50000 |
| Al       | 0.54167                | 2.81458  | 3.00000  | Al | -2.92500 | -5.06625 | 0.50000  |
| Al       | 0.32500                | 5.06625  | 2.50000  | Al | 3.57500  | -5.06625 | 0.50000  |
| Al       | 2.92500                | 5.06625  | 2.00000  | Al | -4.22500 | -2.81458 | -3.00000 |
| Al       | 4.22500                | 2.81458  | 1.50000  | Al | 2.27500  | -2.81458 | -3.00000 |
| Al       | 2.92500                | 0.56292  | 1.00000  | Al | -0.97500 | 2.81458  | -3.00000 |
| Al       | 0.32500                | 0.56292  | 0.50000  | Al | -4.22500 | -2.81458 | 0.00000  |
| Al       | -0.97500               | 2.81458  | 0.00000  | Al | 2.27500  | -2.81458 | 0.00000  |
| Al       | -0.97500               | 2.81458  | 3.00000  | Al | -4.22500 | -2.81458 | 3.00000  |
| Al       | 1.08333                | 3.75278  | -0.50000 | Al | 2.27500  | -2.81458 | 3.00000  |
| Al       | 1.08333                | 1.87639  | 3.50000  | Al | 2.16667  | 3.75278  | 5.00000  |
| Al       | 2.16667                | 3.75278  | -1.00000 | Al | -2.16667 | -1.87639 | -3.50000 |
| Al       | 0.32500                | 5.06625  | -0.50000 | Al | 4.33333  | -1.87639 | -3.50000 |
| Al       | 2.16667                | 1.87639  | 4.00000  | Al | 1.08333  | 3.75278  | -3.50000 |
| Al       | 0.32500                | 0.56292  | 3.50000  | Al | -2.16667 | -3.75278 | 3.50000  |
| Al       | 2.70833                | 2.81458  | -1.50000 | Al | 4.33333  | -3.75278 | 3.50000  |
| Al       | 2.92500                | 5.06625  | -1.00000 | Al | 2.16667  | 3.75278  | -4.00000 |
| Al       | 2.70833                | 2.81458  | 4.50000  | Al | -1.08333 | -3.75278 | 4.00000  |
| Al       | 2.92500                | 0.56292  | 4.00000  | Al | 5.41667  | -3.75278 | 4.00000  |

Supplementary Material (ESI) for Dalton Transactions  
 This journal is © The Royal Society of Chemistry 2003

|          |                        |          |          |      |          |          |          |
|----------|------------------------|----------|----------|------|----------|----------|----------|
| Al       | 4.22500                | 2.81458  | 4.50000  | ATOM | C7       | 0.00000  | 0.25000  |
| Al       | 2.92500                | 5.06625  | 5.00000  |      |          | 0.87500  |          |
| Al       | -2.92500               | -0.56292 | -3.50000 | ATOM | C8       | 0.25000  | 0.37500  |
| Al       | 3.57500                | -0.56292 | -3.50000 |      |          | 0.75000  |          |
| Al       | 0.32500                | 5.06625  | -3.50000 | ATOM | C9       | 0.00000  | 0.62500  |
| Al       | -2.92500               | -5.06625 | 3.50000  |      |          | 0.75000  |          |
| Al       | 3.57500                | -5.06625 | 3.50000  | ATOM | C10      | 0.25000  | 0.75000  |
| Al       | -0.32500               | -0.56292 | -4.00000 |      |          | 0.62500  |          |
| Al       | 6.17500                | -0.56292 | -4.00000 | ATOM | C11      | 0.50000  | 0.87500  |
| Al       | 2.92500                | 5.06625  | -4.00000 |      |          | 0.75000  |          |
| Al       | -0.54167               | -2.81458 | 4.50000  | ATOM | C12      | 0.75000  | 0.75000  |
| Al       | -0.32500               | -2.81458 | 4.00000  |      |          | 0.87500  |          |
| Al       | 5.95833                | -2.81458 | 4.50000  | ATOM | C13      | 0.00000  | 0.75000  |
| Al       | 6.17500                | -5.06625 | 4.00000  |      |          | 0.37500  |          |
| Al       | -3.57500               | 0.56292  | 4.00000  | ATOM | C14      | 0.25000  | 0.62500  |
| Al       | -0.32500               | 6.19208  | 1.00000  |      |          | 0.25000  |          |
| Al       | -0.32500               | 6.19208  | 4.00000  | ATOM | C15      | 0.50000  | 0.75000  |
| Al       | 3.57500                | 6.19208  | 0.50000  |      |          | 0.12500  |          |
| Al       | 3.57500                | 6.19208  | 3.50000  | ATOM | C16      | 0.75000  | 0.87500  |
| Al       | 5.52500                | 2.81458  | 0.00000  |      |          | 0.25000  |          |
| Al       | 5.52500                | 2.81458  | 3.00000  | SPGR | P 1      |          |          |
| Al       | -2.27500               | 2.81458  | 4.50000  |      |          |          |          |
| Al       | -0.32500               | 6.19208  | -2.00000 | 56   |          |          |          |
| Al       | -0.32500               | -0.56292 | 5.00000  |      |          |          |          |
| Al       | 3.57500                | 6.19208  | -2.50000 | B    | 0.00000  | 2.06250  | 1.37500  |
| Al       | 6.82500                | 0.56292  | -2.50000 | B    | 0.75000  | 1.37500  | 0.68750  |
| Al       | 6.82500                | 0.56292  | 0.50000  | B    | 1.50000  | 0.68750  | 1.37500  |
| Al       | 6.82500                | 0.56292  | 3.50000  | B    | 1.50000  | 1.37500  | 3.43750  |
| Al       | 8.77500                | -2.81458 | -3.00000 | B    | 2.25000  | 1.37500  | 2.06250  |
| Al       | 8.77500                | -2.81458 | 0.00000  | B    | 2.25000  | 0.68750  | 4.12500  |
| Al       | 5.52500                | 2.81458  | -3.00000 | B    | 0.00000  | 1.37500  | 4.81250  |
| Al       | 8.77500                | -2.81458 | 3.00000  | B    | 0.00000  | 3.43750  | 4.12500  |
| Al       | 0.32500                | -6.19208 | -3.50000 | B    | 0.75000  | 2.06250  | 4.12500  |
| Al       | 0.32500                | -6.19208 | -0.50000 | B    | 0.75000  | 4.12500  | 3.43750  |
| Al       | 6.82500                | -6.19208 | -3.50000 | B    | 1.50000  | 4.81250  | 4.12500  |
| Al       | 6.82500                | -6.19208 | -0.50000 | B    | 2.25000  | 4.12500  | 4.81250  |
| Al       | 0.32500                | -6.19208 | 2.50000  | B    | 0.00000  | 4.12500  | 2.06250  |
| Al       | 6.82500                | -6.19208 | 2.50000  | B    | 0.75000  | 3.43750  | 1.37500  |
| Al       | -3.57500               | -6.19208 | -4.00000 | B    | 1.50000  | 4.12500  | 0.68750  |
| Al       | -3.57500               | -6.19208 | -1.00000 | B    | 2.25000  | 4.81250  | 1.37500  |
| Al       | 2.92500                | -6.19208 | -4.00000 | B    | -0.75000 | 1.37500  | 2.06250  |
| Al       | 2.92500                | -6.19208 | -1.00000 | B    | 0.00000  | 1.37500  | -0.68750 |
| Al       | -3.57500               | -6.19208 | 2.00000  | B    | 2.25000  | -0.68750 | 1.37500  |
| Al       | 2.92500                | -6.19208 | 2.00000  | B    | 3.00000  | 2.06250  | 1.37500  |
| Al       | -5.52500               | -2.81458 | -1.50000 | B    | 3.00000  | 1.37500  | 4.81250  |
| Al       | -5.52500               | -2.81458 | 1.50000  | B    | 1.50000  | -0.68750 | 4.12500  |
| Al       | -5.52500               | -2.81458 | 4.50000  | B    | 0.75000  | 1.37500  | 6.18750  |
| Al       | 0.97500                | -2.81458 | 4.50000  | B    | -0.75000 | 0.68750  | 4.12500  |
| Al       | -3.57500               | -6.19208 | 5.00000  | B    | -0.75000 | 4.12500  | 4.81250  |
| Al       | 2.92500                | -6.19208 | 5.00000  | B    | 2.25000  | 6.18750  | 4.12500  |
| Al       | -1.08333               | -1.87639 | 5.00000  | B    | 3.00000  | 3.43750  | 4.12500  |
| Al       | 0.32500                | -6.19208 | 5.50000  | B    | 1.50000  | 4.12500  | 6.18750  |
| Al       | 5.41667                | -1.87639 | 5.00000  | B    | -0.75000 | 4.81250  | 1.37500  |
| Al       | 7.47500                | -2.81458 | 4.50000  | B    | 2.25000  | 4.12500  | -0.68750 |
| Al       | 6.82500                | -6.19208 | 5.50000  | B    | 1.50000  | 6.18750  | 1.37500  |
|          |                        |          |          | B    | 3.00000  | 4.12500  | 2.06250  |
| (10,3)-f |                        |          |          | B    | -1.50000 | 0.68750  | 1.37500  |
|          |                        |          |          | B    | -1.50000 | 1.37500  | 3.43750  |
| TITLE    | 103f                   |          |          | B    | 3.75000  | 1.37500  | 0.68750  |
| CELL     | 5. 5.5 5.5 90. 90. 90. |          |          | B    | 3.75000  | 3.43750  | 1.37500  |
| ATOM     | C1                     | 0.00000  | 0.37500  | B    | 3.75000  | 1.37500  | 6.18750  |
|          |                        |          |          | B    | 3.75000  | 2.06250  | 4.12500  |
| ATOM     | C2                     | 0.25000  | 0.25000  | B    | -1.50000 | -0.68750 | 4.12500  |
|          |                        |          |          | B    | -1.50000 | 4.81250  | 4.12500  |
| ATOM     | C3                     | 0.50000  | 0.12500  | B    | -1.50000 | 4.12500  | 6.18750  |
|          |                        |          |          | B    | 3.75000  | 4.12500  | 3.43750  |
| ATOM     | C4                     | 0.75000  | 0.25000  | B    | -1.50000 | 6.18750  | 1.37500  |
|          |                        |          |          | B    | -1.50000 | 4.12500  | 0.68750  |
| ATOM     | C5                     | 0.50000  | 0.25000  | B    | -2.25000 | 1.37500  | 0.68750  |
|          |                        |          |          | B    | -0.75000 | -0.68750 | 1.37500  |
| ATOM     | C6                     | 0.75000  | 0.12500  | B    | -2.25000 | 2.06250  | 4.12500  |
|          |                        |          |          | B    | 4.50000  | 0.68750  | 1.37500  |

Supplementary Material (ESI) for Dalton Transactions  
 This journal is © The Royal Society of Chemistry 2003

|                               |          |         |          |    |          |          |          |
|-------------------------------|----------|---------|----------|----|----------|----------|----------|
| B                             | 3.00000  | 1.37500 | -0.68750 | Al | 10.20000 | 8.50000  | 11.90000 |
| B                             | 4.50000  | 4.12500 | 0.68750  | Al | 3.40000  | 1.70000  | 0.00000  |
| B                             | 4.50000  | 1.37500 | 3.43750  | Al | 3.40000  | 1.70000  | 17.00000 |
| B                             | -0.75000 | 6.18750 | 4.12500  | Al | 11.90000 | 10.20000 | 8.50000  |
| B                             | -2.25000 | 4.12500 | 3.43750  | Al | 0.00000  | 3.40000  | 1.70000  |
| B                             | 4.50000  | 4.81250 | 4.12500  | Al | 17.00000 | 3.40000  | 1.70000  |
| B                             | -0.75000 | 4.12500 | -0.68750 | Al | 8.50000  | 11.90000 | 10.20000 |
| B                             | -2.25000 | 3.43750 | 1.37500  | Al | 0.00000  | 5.10000  | 1.70000  |
|                               |          |         |          | Al | 17.00000 | 5.10000  | 1.70000  |
|                               |          |         |          | Al | 8.50000  | 13.60000 | 10.20000 |
| (10,3)-g                      |          |         |          | Al | 3.40000  | 15.30000 | 8.50000  |
|                               |          |         |          | Al | 11.90000 | 6.80000  | 0.00000  |
| TITLE 103g                    |          |         |          | Al | 11.90000 | 6.80000  | 17.00000 |
| CELL 10. 10. 10. 90. 90. 90.  |          |         |          | Al | 8.50000  | 3.40000  | 15.30000 |
| ATOM C1 0.125 0.125 0.125     |          |         |          | Al | 0.00000  | 11.90000 | 6.80000  |
| ATOM C2 0.125 0.125 0.375     |          |         |          | Al | 17.00000 | 11.90000 | 6.80000  |
| ATOM C3 0.100 0.000 0.200     |          |         |          | Al | 13.60000 | 6.80000  | 0.00000  |
| ATOM C4 0.350 0.050 0.250     |          |         |          | Al | 13.60000 | 6.80000  | 17.00000 |
| SPGR I a -3                   |          |         |          | Al | 5.10000  | 15.30000 | 8.50000  |
|                               |          |         |          | Al | 5.10000  | 1.70000  | 0.00000  |
| 184                           |          |         |          | Al | 5.10000  | 1.70000  | 17.00000 |
|                               |          |         |          | Al | 13.60000 | 10.20000 | 8.50000  |
| Ag 2.12500 2.12500 6.37500    |          |         |          | Al | 0.00000  | 13.60000 | 6.80000  |
| Ag 10.62500 10.62500 14.87500 |          |         |          | Al | 17.00000 | 13.60000 | 6.80000  |
| Ag 6.37500 2.12500 2.12500    |          |         |          | Al | 8.50000  | 5.10000  | 15.30000 |
| Ag 14.87500 10.62500 10.62500 |          |         |          | Al | 15.30000 | 8.50000  | 3.40000  |
| Ag 2.12500 6.37500 2.12500    |          |         |          | Al | 6.80000  | 0.00000  | 11.90000 |
| Ag 10.62500 14.87500 10.62500 |          |         |          | Al | 6.80000  | 17.00000 | 11.90000 |
| Ag 14.87500 2.12500 2.12500   |          |         |          | Al | 1.70000  | 0.00000  | 5.10000  |
| Ag 6.37500 10.62500 10.62500  |          |         |          | Al | 1.70000  | 17.00000 | 5.10000  |
| Ag 6.37500 14.87500 6.37500   |          |         |          | Al | 10.20000 | 8.50000  | 13.60000 |
| Ag 14.87500 6.37500 14.87500  |          |         |          | Al | 6.80000  | 0.00000  | 13.60000 |
| Ag 6.37500 6.37500 14.87500   |          |         |          | Al | 6.80000  | 17.00000 | 13.60000 |
| Ag 14.87500 14.87500 6.37500  |          |         |          | Al | 15.30000 | 8.50000  | 5.10000  |
| Ag 10.62500 6.37500 2.12500   |          |         |          | Al | 15.30000 | 0.00000  | 13.60000 |
| Ag 2.12500 14.87500 10.62500  |          |         |          | Al | 15.30000 | 17.00000 | 13.60000 |
| Ag 2.12500 2.12500 14.87500   |          |         |          | Al | 6.80000  | 8.50000  | 5.10000  |
| Ag 10.62500 10.62500 6.37500  |          |         |          | Al | 13.60000 | 15.30000 | 0.00000  |
| Ag 2.12500 10.62500 6.37500   |          |         |          | Al | 13.60000 | 15.30000 | 17.00000 |
| Ag 10.62500 2.12500 14.87500  |          |         |          | Al | 5.10000  | 6.80000  | 8.50000  |
| Ag 14.87500 6.37500 6.37500   |          |         |          | Al | 0.00000  | 13.60000 | 15.30000 |
| Ag 6.37500 14.87500 14.87500  |          |         |          | Al | 17.00000 | 13.60000 | 15.30000 |
| Ag 2.12500 14.87500 2.12500   |          |         |          | Al | 8.50000  | 5.10000  | 6.80000  |
| Ag 10.62500 6.37500 10.62500  |          |         |          | Al | 0.00000  | 11.90000 | 15.30000 |
| Ag 6.37500 2.12500 10.62500   |          |         |          | Al | 17.00000 | 11.90000 | 15.30000 |
| Ag 14.87500 10.62500 2.12500  |          |         |          | Al | 8.50000  | 3.40000  | 6.80000  |
| Ag 14.87500 14.87500 10.62500 |          |         |          | Al | 13.60000 | 1.70000  | 8.50000  |
| Ag 6.37500 6.37500 2.12500    |          |         |          | Al | 5.10000  | 10.20000 | 0.00000  |
| Ag 10.62500 14.87500 14.87500 |          |         |          | Al | 5.10000  | 10.20000 | 17.00000 |
| Ag 2.12500 6.37500 6.37500    |          |         |          | Al | 8.50000  | 13.60000 | 1.70000  |
| Ag 14.87500 10.62500 14.87500 |          |         |          | Al | 0.00000  | 5.10000  | 10.20000 |
| Ag 6.37500 2.12500 6.37500    |          |         |          | Al | 17.00000 | 5.10000  | 10.20000 |
| Ag 2.12500 14.87500 14.87500  |          |         |          | Al | 3.40000  | 10.20000 | 0.00000  |
| Ag 10.62500 6.37500 6.37500   |          |         |          | Al | 3.40000  | 10.20000 | 17.00000 |
| Ag 10.62500 2.12500 10.62500  |          |         |          | Al | 11.90000 | 1.70000  | 8.50000  |
| Ag 2.12500 10.62500 2.12500   |          |         |          | Al | 11.90000 | 15.30000 | 0.00000  |
| Ag 10.62500 10.62500 2.12500  |          |         |          | Al | 11.90000 | 15.30000 | 17.00000 |
| Ag 2.12500 2.12500 10.62500   |          |         |          | Al | 3.40000  | 6.80000  | 8.50000  |
| Ag 6.37500 10.62500 14.87500  |          |         |          | Al | 0.00000  | 3.40000  | 10.20000 |
| Ag 14.87500 2.12500 6.37500   |          |         |          | Al | 17.00000 | 3.40000  | 10.20000 |
| Ag 14.87500 14.87500 2.12500  |          |         |          | Al | 8.50000  | 11.90000 | 1.70000  |
| Ag 6.37500 6.37500 10.62500   |          |         |          | Al | 1.70000  | 8.50000  | 13.60000 |
| Ag 14.87500 6.37500 10.62500  |          |         |          | Al | 10.20000 | 0.00000  | 5.10000  |
| Ag 6.37500 14.87500 2.12500   |          |         |          | Al | 10.20000 | 17.00000 | 5.10000  |
| Ag 2.12500 10.62500 10.62500  |          |         |          | Al | 15.30000 | 0.00000  | 11.90000 |
| Ag 10.62500 2.12500 2.12500   |          |         |          | Al | 15.30000 | 17.00000 | 11.90000 |
| Ag 14.87500 2.12500 14.87500  |          |         |          | Al | 6.80000  | 8.50000  | 3.40000  |
| Ag 6.37500 10.62500 6.37500   |          |         |          | Al | 10.20000 | 0.00000  | 3.40000  |
| Ag 10.62500 14.87500 6.37500  |          |         |          | Al | 10.20000 | 17.00000 | 3.40000  |
| Ag 2.12500 6.37500 14.87500   |          |         |          | Al | 1.70000  | 8.50000  | 11.90000 |
| Al 1.70000 0.00000 3.40000    |          |         |          | Al | 5.95000  | 8.50000  | 4.25000  |
| Al 1.70000 17.00000 3.40000   |          |         |          | Al | 14.45000 | 9.35000  | 12.75000 |

Supplementary Material (ESI) for Dalton Transactions  
 This journal is © The Royal Society of Chemistry 2003

|    |          |          |          |     |          |          |         |
|----|----------|----------|----------|-----|----------|----------|---------|
| Al | 4.25000  | 5.95000  | 0.85000  | 128 |          |          |         |
| Al | 12.75000 | 14.45000 | 9.35000  |     |          |          |         |
| Al | 0.85000  | 4.25000  | 5.95000  | Al  | 0.64000  | 1.44250  | 2.37362 |
| Al | 9.35000  | 12.75000 | 14.45000 | Al  | 1.86000  | -1.05750 | 2.37362 |
| Al | 16.15000 | 4.25000  | 5.95000  | Al  | -0.64000 | 1.44250  | 2.88163 |
| Al | 7.65000  | 12.75000 | 14.45000 | Al  | 1.86000  | 1.05750  | 2.88163 |
| Al | 4.25000  | 11.05000 | 7.65000  | Al  | 0.64000  | -1.44250 | 2.88163 |
| Al | 12.75000 | 2.55000  | 16.15000 | Al  | 3.14000  | -1.05750 | 2.88163 |
| Al | 7.65000  | 4.25000  | 11.05000 | Al  | 1.86000  | 3.94250  | 2.37362 |
| Al | 16.15000 | 12.75000 | 2.55000  | Al  | -1.86000 | 1.05750  | 2.37362 |
| Al | 12.75000 | 2.55000  | 0.85000  | Al  | -1.05750 | 1.86000  | 4.12537 |
| Al | 4.25000  | 11.05000 | 9.35000  | Al  | 1.44250  | 0.64000  | 4.12537 |
| Al | 4.25000  | 5.95000  | 16.15000 | Al  | 3.14000  | 1.05750  | 2.37362 |
| Al | 12.75000 | 14.45000 | 7.65000  | Al  | 1.05750  | -1.86000 | 4.12537 |
| Al | 0.85000  | 12.75000 | 2.55000  | Al  | -0.64000 | -1.44250 | 2.37362 |
| Al | 9.35000  | 4.25000  | 11.05000 | Al  | 3.55750  | -0.64000 | 4.12537 |
| Al | 11.05000 | 7.65000  | 4.25000  | Al  | 4.36000  | -1.44250 | 2.37362 |
| Al | 2.55000  | 16.15000 | 12.75000 | Al  | 0.64000  | -3.55750 | 2.37362 |
| Al | 5.95000  | 16.15000 | 4.25000  | Al  | 0.64000  | 3.55750  | 2.88163 |
| Al | 14.45000 | 7.65000  | 12.75000 | Al  | 3.14000  | 3.94250  | 2.88163 |
| Al | 2.55000  | 0.85000  | 12.75000 | Al  | -3.14000 | 1.05750  | 2.88163 |
| Al | 11.05000 | 9.35000  | 4.25000  | Al  | -1.44250 | 0.64000  | 4.63338 |
| Al | 11.05000 | 16.15000 | 12.75000 | Al  | -1.05750 | 3.14000  | 4.63338 |
| Al | 2.55000  | 7.65000  | 4.25000  | Al  | 1.05750  | 1.86000  | 4.63338 |
| Al | 12.75000 | 11.05000 | 16.15000 | Al  | 1.44250  | -0.64000 | 4.63338 |
| Al | 4.25000  | 2.55000  | 7.65000  | Al  | 4.36000  | 1.44250  | 2.88163 |
| Al | 16.15000 | 12.75000 | 11.05000 | Al  | 1.05750  | -3.14000 | 4.63338 |
| Al | 7.65000  | 4.25000  | 2.55000  | Al  | -1.86000 | -1.05750 | 2.88163 |
| Al | 0.85000  | 12.75000 | 11.05000 | Al  | 3.55750  | 0.64000  | 4.63338 |
| Al | 9.35000  | 4.25000  | 2.55000  | Al  | 3.94250  | -1.86000 | 4.63338 |
| Al | 12.75000 | 5.95000  | 9.35000  | Al  | -0.64000 | -3.55750 | 2.88163 |
| Al | 4.25000  | 14.45000 | 0.85000  | Al  | 1.86000  | -3.94250 | 2.88163 |
| Al | 9.35000  | 12.75000 | 5.95000  | Al  | 1.05750  | 3.14000  | 4.12537 |
| Al | 0.85000  | 4.25000  | 14.45000 | Al  | -0.64000 | 3.55750  | 2.37362 |
| Al | 4.25000  | 14.45000 | 16.15000 | Al  | 3.55750  | 4.36000  | 4.12537 |
| Al | 12.75000 | 5.95000  | 7.65000  | Al  | 4.36000  | 3.55750  | 2.37362 |
| Al | 12.75000 | 11.05000 | 0.85000  | Al  | -3.55750 | 0.64000  | 4.12537 |
| Al | 4.25000  | 2.55000  | 9.35000  | Al  | -1.44250 | -0.64000 | 4.12537 |
| Al | 16.15000 | 4.25000  | 14.45000 | Al  | -1.44250 | 4.36000  | 4.12537 |
| Al | 7.65000  | 12.75000 | 5.95000  | Al  | 3.94250  | 1.86000  | 4.12537 |
| Al | 5.95000  | 9.35000  | 12.75000 | Al  | 1.44250  | -4.36000 | 4.12537 |
| Al | 14.45000 | 0.85000  | 4.25000  | Al  | -3.14000 | -1.05750 | 2.37362 |
| Al | 11.05000 | 0.85000  | 12.75000 | Al  | 3.94250  | -3.14000 | 4.12537 |
| Al | 2.55000  | 9.35000  | 4.25000  | Al  | -1.86000 | -3.94250 | 2.37362 |
| Al | 14.45000 | 16.15000 | 4.25000  | Al  | -1.05750 | -3.14000 | 4.12537 |
| Al | 5.95000  | 7.65000  | 12.75000 | Al  | 3.14000  | -3.94250 | 2.37362 |
| Ag | 2.12500  | 2.12500  | 2.12500  | Al  | -1.86000 | 1.05750  | 5.87712 |
| Ag | 10.62500 | 10.62500 | 10.62500 | Al  | -0.64000 | 3.55750  | 5.87712 |
| Ag | 14.87500 | 6.37500  | 2.12500  | Al  | 0.64000  | 1.44250  | 5.87712 |
| Ag | 6.37500  | 14.87500 | 10.62500 | Al  | 1.86000  | -1.05750 | 5.87712 |
| Ag | 2.12500  | 14.87500 | 6.37500  | Al  | 0.64000  | -3.55750 | 5.87712 |
| Ag | 10.62500 | 6.37500  | 14.87500 | Al  | 3.14000  | 1.05750  | 5.87712 |
| Ag | 6.37500  | 2.12500  | 14.87500 | Al  | 4.36000  | -1.44250 | 5.87712 |
| Ag | 14.87500 | 10.62500 | 6.37500  | Al  | 1.44250  | 4.36000  | 4.63338 |
| Ag | 14.87500 | 14.87500 | 14.87500 | Al  | -1.86000 | 3.94250  | 2.88163 |
| Ag | 6.37500  | 6.37500  | 6.37500  | Al  | 3.94250  | 3.14000  | 4.63338 |
| Ag | 2.12500  | 10.62500 | 14.87500 | Al  | -3.94250 | 1.86000  | 4.63338 |
| Ag | 10.62500 | 2.12500  | 6.37500  | Al  | -3.55750 | -0.64000 | 4.63338 |
| Ag | 14.87500 | 2.12500  | 10.62500 | Al  | -1.05750 | -1.86000 | 4.63338 |
| Ag | 6.37500  | 10.62500 | 2.12500  | Al  | -4.36000 | -1.44250 | 2.88163 |
| Ag | 10.62500 | 14.87500 | 2.12500  | Al  | 4.36000  | -3.55750 | 2.88163 |
| Ag | 2.12500  | 6.37500  | 10.62500 | Al  | 3.55750  | -4.36000 | 4.63338 |
|    |          |          |          | Al  | -3.14000 | -3.94250 | 2.88163 |
|    |          |          |          | Al  | -1.44250 | -4.36000 | 4.63338 |
|    |          |          |          | Al  | -0.64000 | 1.44250  | 6.38513 |
|    |          |          |          | Al  | -3.14000 | 1.05750  | 6.38513 |
|    |          |          |          | Al  | 0.64000  | 3.55750  | 6.38513 |
|    |          |          |          | Al  | -1.86000 | 3.94250  | 6.38513 |
|    |          |          |          | Al  | 1.86000  | 1.05750  | 6.38513 |
|    |          |          |          | Al  | 0.64000  | -1.44250 | 6.38513 |
|    |          |          |          | Al  | 3.14000  | -1.05750 | 6.38513 |
|    |          |          |          | Al  | -0.64000 | -3.55750 | 6.38513 |

3/10/t2

TITLE 3/10/t2

CELL 4. 4. 2.8 90.000 90.000

90.000

ATOM C .0385 .3780 -0.0725

SPGR P 42/n b c

Supplementary Material (ESI) for Dalton Transactions  
This journal is © The Royal Society of Chemistry 2003

|    |          |          |         |    |          |         |          |
|----|----------|----------|---------|----|----------|---------|----------|
| Al | 1.86000  | -3.94250 | 6.38513 | Al | -0.53040 | 2.34720 | 4.97403  |
| Al | 4.36000  | 1.44250  | 6.38513 | Al | 2.34720  | 4.53040 | 6.18863  |
| Al | 1.86000  | 3.94250  | 5.87712 | Al | 2.34720  | 3.46960 | 8.61783  |
| Al | -3.14000 | 3.94250  | 2.37362 | Al | -0.53040 | 2.34720 | 9.83243  |
| Al | 4.36000  | 3.55750  | 5.87712 | Al | -1.65280 | 3.46960 | 4.74277  |
| Al | -3.94250 | 3.14000  | 4.12537 | Al | 1.65280  | 4.53040 | 4.74277  |
| Al | -4.36000 | 1.44250  | 5.87712 | Al | 1.65280  | 4.53040 | 9.60117  |
| Al | -3.14000 | -1.05750 | 5.87712 | Al | 0.53040  | 1.65280 | 10.81577 |
| Al | -3.94250 | -1.86000 | 4.12537 | Al | -1.65280 | 3.46960 | 9.60117  |
| Al | -0.64000 | -1.44250 | 5.87712 | Al | -2.34720 | 3.46960 | 6.18863  |
| Al | 3.14000  | -3.94250 | 5.87712 | Al | 0.53040  | 5.65280 | 4.97403  |
| Al | -3.55750 | -4.36000 | 4.12537 | Al | 2.34720  | 4.53040 | 11.04703 |
| Al | -1.86000 | -3.94250 | 5.87712 | Al | 0.53040  | 5.65280 | 9.83243  |
| Al | -1.05750 | 1.86000  | 7.62887 | Al | 0.53040  | 2.34720 | 12.26163 |
| Al | -3.55750 | 0.64000  | 7.62887 | Al | -2.34720 | 3.46960 | 11.04703 |
| Al | 1.05750  | 3.14000  | 7.62887 | Al | -2.34720 | 4.53040 | 8.61783  |
| Al | -3.14000 | 3.94250  | 5.87712 | Al | -1.65280 | 4.53040 | 7.17197  |
| Al | -1.44250 | 4.36000  | 7.62887 | Al | -0.53040 | 6.34720 | 5.95737  |
| Al | 1.44250  | 0.64000  | 7.62887 | Al | 1.65280  | 3.46960 | 12.03037 |
| Al | 1.05750  | -1.86000 | 7.62887 | Al | -0.53040 | 6.34720 | 10.81577 |
| Al | 3.55750  | -0.64000 | 7.62887 | Al | 0.53040  | 6.34720 | 8.38657  |
| Al | -1.05750 | -3.14000 | 7.62887 | Al | -0.53040 | 1.65280 | 13.24497 |
| Al | 1.44250  | -4.36000 | 7.62887 | Al | -1.65280 | 4.53040 | 12.03037 |
| Al | 3.94250  | 1.86000  | 7.62887 | Al | 2.34720  | 3.46960 | 13.47623 |
| Al | 3.14000  | 3.94250  | 6.38513 | Al | -0.53040 | 5.65280 | 7.40323  |
| Al | -4.36000 | 3.55750  | 2.88163 | Al | -0.53040 | 5.65280 | 12.26163 |
| Al | -3.55750 | 4.36000  | 4.63338 | Al | 0.53040  | 6.34720 | 13.24497 |
| Al | -4.36000 | -1.44250 | 6.38513 | Al | 1.65280  | 0.53040 | 6.18863  |
| Al | -1.86000 | -1.05750 | 6.38513 | Al | -1.65280 | 0.53040 | 8.61783  |
| Al | -3.94250 | -3.14000 | 4.63338 | Al | 3.46960  | 5.65280 | 5.95737  |
| Al | 4.36000  | -3.55750 | 6.38513 | Al | 3.46960  | 2.34720 | 8.38657  |
| Al | -3.14000 | -3.94250 | 6.38513 | Al | 1.65280  | 0.53040 | 11.04703 |
| Al | -1.44250 | 0.64000  | 8.13688 | Al | -3.46960 | 2.34720 | 5.95737  |
| Al | -1.05750 | 3.14000  | 8.13688 | Al | 3.46960  | 5.65280 | 10.81577 |
| Al | -3.94250 | 1.86000  | 8.13688 | Al | -3.46960 | 2.34720 | 10.81577 |
| Al | -3.55750 | -0.64000 | 8.13688 | Al | -3.46960 | 5.65280 | 8.38657  |
| Al | 1.05750  | 1.86000  | 8.13688 | Al | -1.65280 | 7.46960 | 11.04703 |
| Al | -4.36000 | 3.55750  | 6.38513 | Al | 1.65280  | 7.46960 | 8.61783  |
| Al | 1.44250  | -0.64000 | 8.13688 | Al | -1.65280 | 0.53040 | 13.47623 |
| Al | 1.05750  | -3.14000 | 8.13688 | Al | 3.46960  | 2.34720 | 13.24497 |
| Al | 3.55750  | 0.64000  | 8.13688 | Al | 1.65280  | 7.46960 | 13.47623 |
| Al | 3.94250  | -1.86000 | 8.13688 | Al | 2.34720  | 0.53040 | 4.74277  |
| Al | -1.05750 | -1.86000 | 8.13688 | Al | -2.34720 | 0.53040 | 7.17197  |
| Al | 3.94250  | 3.14000  | 8.13688 | Al | 3.46960  | 6.34720 | 7.40323  |
| Al | 3.55750  | 4.36000  | 7.62887 | Al | 4.53040  | 6.34720 | 4.97403  |
| Al | -3.94250 | -1.86000 | 7.62887 | Al | 3.46960  | 1.65280 | 9.83243  |
| Al | -1.44250 | -0.64000 | 7.62887 | Al | 4.53040  | 1.65280 | 7.40323  |
| Al | -4.36000 | -3.55750 | 5.87712 | Al | 2.34720  | 0.53040 | 9.60117  |
| Al | 3.94250  | -3.14000 | 7.62887 | Al | -3.46960 | 1.65280 | 7.40323  |
| Al | -3.55750 | -4.36000 | 7.62887 | Al | 3.46960  | 1.65280 | 4.97403  |
| Al | -3.94250 | 3.14000  | 7.62887 | Al | 3.46960  | 6.34720 | 12.26163 |
| Al | -3.94250 | -3.14000 | 8.13688 | Al | 4.53040  | 6.34720 | 9.83243  |
| Al | -4.36000 | 1.44250  | 2.37362 | Al | -3.46960 | 1.65280 | 12.26163 |
| Al | -4.36000 | -3.55750 | 2.37362 | Al | -3.46960 | 6.34720 | 9.83243  |
| Al | 1.44250  | 4.36000  | 8.13688 | Al | -2.34720 | 7.46960 | 9.60117  |
| Al | -1.44250 | -4.36000 | 8.13688 | Al | 2.34720  | 7.46960 | 7.17197  |
| Al | 3.55750  | -4.36000 | 8.13688 | Al | -2.34720 | 0.53040 | 12.03037 |
| Al | -3.55750 | 4.36000  | 8.13688 | Al | 4.53040  | 1.65280 | 12.26163 |
|    |          |          |         | Al | 2.34720  | 7.46960 | 12.03037 |
|    |          |          |         | Al | 4.53040  | 5.65280 | 8.38657  |
|    |          |          |         | Al | 5.65280  | 7.46960 | 4.74277  |
|    |          |          |         | Al | 4.53040  | 2.34720 | 10.81577 |
|    |          |          |         | Al | 4.53040  | 2.34720 | 5.95737  |
|    |          |          |         | Al | 5.65280  | 0.53040 | 7.17197  |
|    |          |          |         | Al | 4.53040  | 5.65280 | 13.24497 |
|    |          |          |         | Al | 5.65280  | 7.46960 | 9.60117  |
|    |          |          |         | Al | 5.65280  | 4.53040 | 8.61783  |
|    |          |          |         | Al | 6.34720  | 7.46960 | 6.18863  |
|    |          |          |         | Al | 5.65280  | 3.46960 | 11.04703 |
|    |          |          |         | Al | 5.65280  | 3.46960 | 6.18863  |
|    |          |          |         | Al | 6.34720  | 0.53040 | 8.61783  |
|    |          |          |         | Al | 5.65280  | 4.53040 | 13.47623 |

3/10/t5

TITLE 3/10/t5

CELL 8. 8. 4.8584 90. 90. 90.

ATOM C 0.06630 0.20660 0.22620

SPGR I 41/a c d

86

|    |          |         |         |
|----|----------|---------|---------|
| Al | 0.53040  | 2.34720 | 7.40323 |
| Al | 0.53040  | 1.65280 | 5.95737 |
| Al | 1.65280  | 3.46960 | 7.17197 |
| Al | -0.53040 | 1.65280 | 8.38657 |



Supplementary Material (ESI) for Dalton Transactions  
This journal is © The Royal Society of Chemistry 2003

|    |         |         |          |   |          |         |          |
|----|---------|---------|----------|---|----------|---------|----------|
| Al | 6.34720 | 7.46960 | 11.04703 | B | -3.92540 | 2.80345 | 0.38862  |
| Al | 6.34720 | 4.53040 | 7.17197  | B | -1.94655 | 8.67540 | 1.36033  |
| Al | 6.34720 | 3.46960 | 9.60117  | B | 1.94655  | 8.67540 | -0.38862 |
| Al | 7.46960 | 6.34720 | 5.95737  | B | -1.94655 | 8.67540 | -2.13757 |
| Al | 6.34720 | 4.53040 | 12.03037 | B | -1.94655 | 0.82460 | -3.88652 |
| Al | 7.46960 | 1.65280 | 8.38657  | B | -3.92540 | 6.69655 | 2.13757  |
| Al | 7.46960 | 6.34720 | 10.81577 | B | 3.92540  | 2.80345 | 2.13757  |
| Al | 7.46960 | 5.65280 | 7.40323  | B | -1.94655 | 8.67540 | -5.63547 |
| Al | 7.46960 | 2.34720 | 9.83243  | B | 1.94655  | 8.67540 | -3.88652 |
| Al | 7.46960 | 5.65280 | 12.26163 | B | 1.94655  | 0.82460 | -5.63547 |

3/10/t6

TITLE 3/10/t6  
CELL 10. 10. 3.682 90. 90. 90.  
ATOM C 0.0868 0.4549 -0.0139  
SPGR I41/acd

89

|   |          |         |          |
|---|----------|---------|----------|
| B | 0.82460  | 1.94655 | 0.38862  |
| B | -0.82460 | 2.80345 | 0.48586  |
| B | 0.82460  | 2.80345 | -1.26309 |
| B | -0.82460 | 1.94655 | 2.13757  |
| B | -1.94655 | 3.92540 | -0.48586 |
| B | 1.94655  | 3.92540 | -2.23481 |
| B | -0.82460 | 1.94655 | -1.36033 |
| B | 0.82460  | 2.80345 | 2.23481  |
| B | -2.80345 | 3.92540 | -2.13757 |
| B | -2.80345 | 5.57460 | -0.38862 |
| B | 2.80345  | 5.57460 | -2.13757 |
| B | 2.80345  | 3.92540 | -3.88652 |
| B | -0.82460 | 2.80345 | -3.01204 |
| B | 1.94655  | 3.92540 | 1.26309  |
| B | -1.94655 | 5.57460 | -2.23481 |
| B | -1.94655 | 5.57460 | 1.26309  |
| B | 1.94655  | 5.57460 | -0.48586 |
| B | 1.94655  | 5.57460 | -3.98376 |
| B | 0.82460  | 1.94655 | -3.10928 |
| B | -1.94655 | 3.92540 | -3.98376 |
| B | 2.80345  | 5.57460 | 1.36033  |
| B | 2.80345  | 3.92540 | -0.38862 |
| B | -0.82460 | 6.69655 | -1.26309 |
| B | -2.80345 | 5.57460 | -3.88652 |
| B | -2.80345 | 3.92540 | 1.36033  |
| B | -0.82460 | 6.69655 | 2.23481  |
| B | 0.82460  | 6.69655 | 0.48586  |
| B | 2.80345  | 5.57460 | -5.63547 |
| B | 0.82460  | 6.69655 | -3.01204 |
| B | 0.82460  | 2.80345 | -4.76099 |
| B | -2.80345 | 3.92540 | -5.63547 |
| B | -1.94655 | 3.92540 | 3.01204  |
| B | 1.94655  | 5.57460 | 3.01204  |
| B | -0.82460 | 7.55345 | 0.38862  |
| B | 0.82460  | 7.55345 | -1.36033 |
| B | 1.94655  | 3.92540 | 2.13757  |
| B | -0.82460 | 7.55345 | -3.10928 |
| B | -0.82460 | 1.94655 | -4.85823 |
| B | -1.94655 | 5.57460 | -5.73271 |
| B | -2.80345 | 5.57460 | 3.10928  |
| B | 2.80345  | 3.92540 | 3.10928  |
| B | -0.82460 | 6.69655 | -4.76099 |
| B | 0.82460  | 7.55345 | -4.85823 |
| B | -1.94655 | 0.82460 | -0.38862 |
| B | -3.92540 | 6.69655 | -1.36033 |
| B | 3.92540  | 6.69655 | -3.10928 |
| B | 3.92540  | 2.80345 | -4.85823 |
| B | 1.94655  | 0.82460 | -2.13757 |
| B | 3.92540  | 6.69655 | 0.38862  |
| B | 3.92540  | 2.80345 | -1.36033 |
| B | -3.92540 | 6.69655 | -4.85823 |

3/10/t7

TITLE 3/10/t7  
CELL 6. 6. 8.3088 90. 90. 90.  
ATOM C 0.1227 0.5342 -0.0377  
SPGR I 41/a c d

120

|    |          |          |          |
|----|----------|----------|----------|
| Al | 1.51060  | 2.64110  | -0.84625 |
| Al | 1.51060  | 0.85890  | -1.57715 |
| Al | 1.98940  | 4.35890  | -1.57715 |
| Al | 1.98940  | -0.85890 | -0.84625 |
| Al | 0.85890  | 1.51060  | -3.26965 |
| Al | 2.64110  | 5.01060  | -3.26965 |
| Al | 1.98940  | 6.14110  | -0.84625 |
| Al | 1.98940  | -2.64110 | -1.57715 |
| Al | 2.64110  | 1.51060  | -4.00055 |
| Al | -0.85890 | 1.98940  | -4.00055 |
| Al | 4.35890  | 5.48940  | -4.00055 |
| Al | 0.85890  | 5.01060  | -4.00055 |
| Al | -1.98940 | 0.85890  | -0.84625 |
| Al | 5.01060  | 0.85890  | -0.84625 |
| Al | 2.64110  | -1.98940 | -3.26965 |
| Al | 1.98940  | 0.85890  | -5.69305 |
| Al | 4.35890  | 1.98940  | -3.26965 |
| Al | -1.51060 | 2.64110  | -5.69305 |
| Al | -2.64110 | 1.98940  | -3.26965 |
| Al | 6.14110  | 5.48940  | -3.26965 |
| Al | 5.01060  | 6.14110  | -5.69305 |
| Al | 1.51060  | 4.35890  | -5.69305 |
| Al | -0.85890 | 5.48940  | -3.26965 |
| Al | -1.51060 | -0.85890 | -1.57715 |
| Al | -1.98940 | 2.64110  | -1.57715 |

Supplementary Material (ESI) for Dalton Transactions  
This journal is © The Royal Society of Chemistry 2003

|    |          |          |          |    |          |          |         |
|----|----------|----------|----------|----|----------|----------|---------|
| Al | 5.48940  | -0.85890 | -1.57715 | Al | 5.01060  | -2.64110 | 3.26965 |
| Al | 5.01060  | 2.64110  | -1.57715 | Al | 1.51060  | -0.85890 | 3.26965 |
| Al | 4.35890  | -1.51060 | -4.00055 | Al | -1.98940 | 4.35890  | 3.26965 |
| Al | 0.85890  | -1.98940 | -4.00055 | Al | 5.01060  | 4.35890  | 3.26965 |
| Al | 1.98940  | 2.64110  | -6.42395 | Al | 1.51060  | 6.14110  | 3.26965 |
| Al | 1.51060  | -0.85890 | -6.42395 | Al | -5.48940 | 6.14110  | 3.26965 |
| Al | 6.14110  | 1.98940  | -4.00055 | Al | 5.48940  | 0.85890  | 3.26965 |
| Al | -1.98940 | 4.35890  | -6.42395 | Al | 1.98940  | 2.64110  | 3.26965 |
| Al | -1.51060 | 0.85890  | -6.42395 | Al | -1.51060 | 0.85890  | 3.26965 |
| Al | -4.35890 | 1.51060  | -4.00055 | Al | -5.01060 | 2.64110  | 3.26965 |
| Al | 5.48940  | 6.14110  | -1.57715 | Al | -5.48940 | -0.85890 | 3.26965 |
| Al | 5.01060  | 4.35890  | -6.42395 | Al | 1.51060  | -2.64110 | 4.00055 |
| Al | 1.51060  | 6.14110  | -6.42395 | Al | 1.98940  | 0.85890  | 4.00055 |
| Al | -2.64110 | 5.48940  | -4.00055 | Al | 5.01060  | -0.85890 | 4.00055 |
| Al | -1.51060 | 6.14110  | -1.57715 | Al | -5.48940 | -2.64110 | 4.00055 |
| Al | -0.85890 | -1.51060 | -3.26965 | Al | -5.48940 | 4.35890  | 4.00055 |
| Al | -1.51060 | -2.64110 | -0.84625 | Al | -5.01060 | 0.85890  | 4.00055 |
| Al | -1.51060 | 4.35890  | -0.84625 | Al | -1.51060 | 2.64110  | 4.00055 |
| Al | -5.48940 | 2.64110  | -0.84625 | Al | -1.98940 | -0.85890 | 4.00055 |
| Al | 6.14110  | -1.51060 | -3.26965 | Al | 1.51060  | 4.35890  | 4.00055 |
| Al | 5.48940  | -2.64110 | -0.84625 | Al | 5.48940  | 2.64110  | 4.00055 |
| Al | 5.48940  | 4.35890  | -0.84625 | Al | -1.98940 | 6.14110  | 4.00055 |
| Al | 5.01060  | -0.85890 | -5.69305 | Al | 5.01060  | 6.14110  | 4.00055 |
| Al | 1.51060  | -2.64110 | -5.69305 |    |          |          |         |
| Al | 5.48940  | 2.64110  | -5.69305 |    |          |          |         |
| Al | -1.98940 | 6.14110  | -5.69305 |    |          |          |         |
| Al | -1.98940 | -0.85890 | -5.69305 |    |          |          |         |
| Al | -6.14110 | 1.51060  | -3.26965 |    |          |          |         |
| Al | -5.01060 | 0.85890  | -5.69305 |    |          |          |         |
| Al | -4.35890 | 5.01060  | -3.26965 |    |          |          |         |
| Al | -2.64110 | -1.51060 | -4.00055 |    |          |          |         |
| Al | -5.48940 | 0.85890  | -1.57715 |    |          |          |         |
| Al | -5.01060 | 4.35890  | -1.57715 |    |          |          |         |
| Al | 5.01060  | -2.64110 | -6.42395 |    |          |          |         |
| Al | 5.48940  | 0.85890  | -6.42395 |    |          |          |         |
| Al | -1.98940 | -2.64110 | -6.42395 |    |          |          |         |
| Al | -5.01060 | 2.64110  | -6.42395 |    |          |          |         |
| Al | -5.48940 | -0.85890 | -6.42395 |    |          |          |         |
| Al | -6.14110 | 5.01060  | -4.00055 |    |          |          |         |
| Al | -4.35890 | -1.98940 | -3.26965 |    |          |          |         |
| Al | -5.01060 | -0.85890 | -0.84625 |    |          |          |         |
| Al | -5.01060 | 6.14110  | -0.84625 |    |          |          |         |
| Al | -5.48940 | 4.35890  | -5.69305 |    |          |          |         |
| Al | -5.48940 | -2.64110 | -5.69305 |    |          |          |         |
| Al | -6.14110 | -1.98940 | -4.00055 |    |          |          |         |
| Al | -5.01060 | -2.64110 | -1.57715 |    |          |          |         |
| Al | -5.48940 | 6.14110  | -6.42395 |    |          |          |         |
| Al | 0.85890  | 1.98940  | 0.84625  |    |          |          |         |
| Al | 2.64110  | -1.51060 | 0.84625  |    |          |          |         |
| Al | 4.35890  | 1.51060  | 0.84625  |    |          |          |         |
| Al | 2.64110  | 5.48940  | 0.84625  |    |          |          |         |
| Al | -2.64110 | 1.51060  | 0.84625  |    |          |          |         |
| Al | -6.14110 | 1.98940  | 0.84625  |    |          |          |         |
| Al | -0.85890 | -1.98940 | 0.84625  |    |          |          |         |
| Al | 6.14110  | -1.98940 | 0.84625  |    |          |          |         |
| Al | 6.14110  | 5.01060  | 0.84625  |    |          |          |         |
| Al | -4.35890 | -1.51060 | 0.84625  |    |          |          |         |
| Al | -0.85890 | 5.01060  | 0.84625  |    |          |          |         |
| Al | -4.35890 | 5.48940  | 0.84625  |    |          |          |         |
| Al | -2.64110 | -1.98940 | 1.57715  |    |          |          |         |
| Al | 0.85890  | -1.51060 | 1.57715  |    |          |          |         |
| Al | 4.35890  | -1.98940 | 1.57715  |    |          |          |         |
| Al | 4.35890  | 5.01060  | 1.57715  |    |          |          |         |
| Al | 6.14110  | 1.51060  | 1.57715  |    |          |          |         |
| Al | -6.14110 | -1.51060 | 1.57715  |    |          |          |         |
| Al | -2.64110 | 5.01060  | 1.57715  |    |          |          |         |
| Al | 0.85890  | 5.48940  | 1.57715  |    |          |          |         |
| Al | -6.14110 | 5.48940  | 1.57715  |    |          |          |         |
| Al | -4.35890 | 1.98940  | 1.57715  |    |          |          |         |
| Al | -0.85890 | 1.51060  | 1.57715  |    |          |          |         |
| Al | 2.64110  | 1.98940  | 1.57715  |    |          |          |         |
| Al | -1.98940 | -2.64110 | 3.26965  |    |          |          |         |
