# Supplementary material for: What kinds of three-dimensional nets are possible with tris-chelated metal complexes as building blocks?
Source: Royal Society of Chemistry journal article supplement (doi:10.1039/b310330g), 2004-01-01
Supplement: b310330gomega.pdf [file b310330gomega.pdf]

## Supplementary material

In Fig.S1 we give the definition used for  $\omega$  when measuring on a single isolated complex since this may not be completely obvious. The complete results for the dihedral angle  $\omega$  are shown in Fig.S2 Note the small fraction of points at low angles. These correspond to trigonal prisms and fall outside the scope of this article.

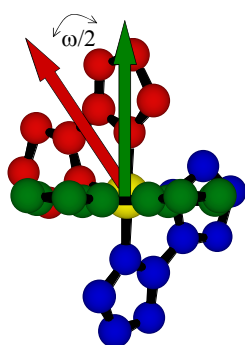

**Fig.S1** The normal to the plane through the green ligand is used to calculate  $\omega$  by taking the angle it makes with the projected red propagation vector.

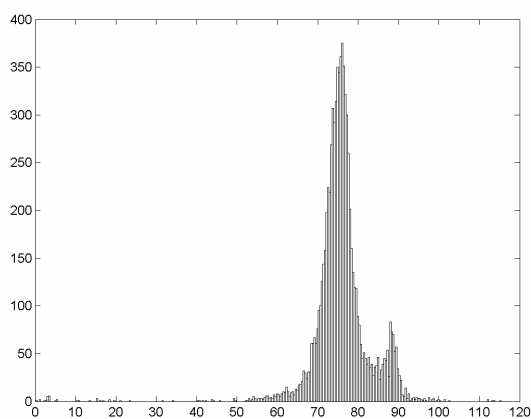

**Fig.S2** Measurements of  $\omega$  for transition metal chelates using the CCDC-database.
